# Supplementary material for: Estimation of Ecological and Human Health Risks Posed by Heavy Metals in Street Dust of Madrid City (Spain)
Source: MDPI journal article supplement (doi:10.3390/ijerph19095263), 2022-04-26
Supplement: s1 [file s1]

**Table S1:** Coordinates of urban dust sampling sites

| Sample | Latitude      | Longitude    |
|--------|---------------|--------------|
| (0,1)  | 40°24'29,39'' | 3°42'45,68'' |
| (0,2)  | 40°24'44,34'' | 3°42'45,13'' |
| (0,3)  | 40°24'59,02'' | 3°42'46,91'' |
| (0,4)  | 40°25'14,88'' | 3°42'45,30'' |
| (0,5)  | 40°25'26,08'' | 3°42'42,80'' |
| (0,6)  | 40°25'41,68'' | 3°42'47,85'' |
| (0,7)  | 40°25'59,71'' | 3°42'45,41'' |
| (1,1)  | 40°24'28,65'' | 3°42'26,49'' |
| (1,2)  | 40°24'44,74'' | 3°42'26,51'' |
| (1,3)  | 40°24'58,57'' | 3°42'25,32'' |
| (1,4)  | 40°25'13,26'' | 3°42'22,89'' |
| (1,5)  | 40°25'29,72'' | 3°42'26,00'' |
| (1,6)  | 40°25'44,38'' | 3°42'25,19'' |
| (1,7)  | 40°25'58,52'' | 3°42'26,24'' |
| (2,1)  | 40°24'27,46'' | 3°42'10,50'' |
| (2,2)  | 40°24'44,00'' | 3°42'06,65'' |
| (2,3)  | 40°25'00,29'' | 3°42'08,25'' |
| (2,4)  | 40°25'09,58'' | 3°42'00,28'' |
| (2,5)  | 40°25'25,35'' | 3°42'06,63'' |
| (2,6)  | 40°25'43,09'' | 3°42'09,18'' |
| (2,7)  | 40°25'57,07'' | 3°42'06,80'' |
| (3,1)  | 40°24'38,82'' | 3°42'47,22'' |
| (3,2)  | 40°24'45,67'' | 3°41'45,31'' |
| (3,3)  | 40°25'00,33'' | 3°41'44,15'' |
| (3,4)  | 40°25'12,11'' | 3°41'46,08'' |
| (3,5)  | 40°25'27,63'' | 3°41'42,86'' |
| (3,6)  | 40°26'42,30'' | 3°41'44,19'' |
| (3,7)  | 40°26'59,50'' | 3°41'51,99'' |
| (4,1)  | 40°24'27,11'' | 3°41'21,40'' |
| (4,2)  | 40°24'45,55'' | 3°41'24,82'' |
| (4,3)  | 40°24'59,52'' | 3°41'24,40'' |
| (4,4)  | 40°25'12,41'' | 3°41'26,66'' |
| (4,5)  | 40°25'30,00'' | 3°41'16,84'' |
| (4,6)  | 40°25'41,15'' | 3°41'27,95'' |
| (4,7)  | 40°25'57,69'' | 3°41'25,26'' |

**Table S2.** Pearson's correlation matrix between the variables studied.

|           | Cd<br>CF | Cr<br>CF | Cu<br>CF | Ni<br>CF | Pb<br>CF | Zn<br>CF | PL<br>CF | PL<br>PLI | PL<br>RI | Ca    | Cd      | Cr      | Cu      | Ni      | Pb      | Zn      | PL      | Cd<br>EF | Cr<br>EF | Cu<br>EF | Ni<br>EF | Pb<br>EF | Zn<br>EF | PL<br>EF | Cd<br>Igeo | Cr<br>Igeo | Cu<br>Igeo | Ni<br>Igeo | Pb<br>Igeo | Zn<br>Igeo | PL<br>Igeo |
|-----------|----------|----------|----------|----------|----------|----------|----------|-----------|----------|-------|---------|---------|---------|---------|---------|---------|---------|----------|----------|----------|----------|----------|----------|----------|------------|------------|------------|------------|------------|------------|------------|
| Cd<br>CF  | 1        | -.001    | .349*    | -.049    | .020     | .200     | .198     | .457**    | .457**   | -.032 | 1.000** | -.001   | .349*   | -.049   | .020    | .200    | .198    | .856**   | .022     | .404*    | -.033    | .058     | .248     | .303     | .936**     | .061       | .361*      | -.027      | .299       | .217       | .281       |
| Cr<br>CF  | -.001    | 1        | .248     | .907**   | -.032    | .310     | .263     | .682**    | .001     | .126  | -.002   | 1.000** | .248    | .907**  | -.032   | .310    | .263    | -.075    | .819**   | .132     | .753**   | -.036    | .171     | .186     | .116       | .932**     | .353*      | .878**     | .189       | .396*      | .455**     |
| Cu<br>CF  | .349*    | .248     | 1        | .146     | -.060    | .327     | .392*    | .653**    | .138     | -.025 | .348*   | .248    | 1.000** | .145    | -.060   | .327    | .392*   | .344*    | .213     | .930**   | .128     | -.040    | .272     | .445**   | .469**     | .345*      | .914*      | .318       | .092       | .400*      | .511**     |
| Ni<br>CF  | -.049    | .907**   | .146     | 1        | -.069    | .192     | .154     | .540**    | -.058    | .109  | -.049   | .907**  | .146    | 1.000** | -.069   | .192    | .154    | -.086    | .748**   | .079     | .856**   | -.069    | .112     | .119     | .034       | .776**     | .214       | .887**     | .072       | .254       | .300       |
| Pb<br>CF  | .020     | -.032    | -.060    | -.069    | 1        | .258     | .781**   | .254      | .897**   | .255  | .020    | -.031   | -.060   | -.069   | 1.000** | .258    | .781**  | -.043    | -.105    | -.086    | -.113    | .953**   | .070     | .433*    | .031       | -.012      | -.080      | -.108      | .752**     | .289       | .544**     |
| Zn<br>CF  | .200     | .310     | .327     | .192     | .258     | 1        | .747**   | .660**    | .343*    | -.107 | .201    | .310    | .327    | .192    | .258    | 1.000** | .747**  | .267     | .380*    | .364*    | .255     | .312     | .905**   | .835**   | .261       | .422*      | .350*      | .314       | .391*      | .947**     | .822**     |
| PL<br>CF  | .198     | .263     | .392*    | .154     | .781**   | .747**   | 1        | .701**    | .806**   | .127  | .198    | .263    | .392*   | .154    | .781**  | .747**  | 1.000** | .180     | .223     | .366*    | .137     | .780**   | .551**   | .813**   | .274       | .347*      | .373*      | .225       | .730**     | .769**     | .918**     |
| PL<br>PLI | .457**   | .682**   | .653**   | .540**   | .254     | .660**   | .701**   | 1         | .462**   | -.003 | .457**  | .682**  | .653**  | .540**  | .254    | .660**  | .701**  | .410*    | .636**   | .609**   | .513**   | .321     | .545**   | .707**   | .593**     | .744**     | .683**     | .652**     | .567**     | .732**     | .848**     |
| PL<br>RI  | .457**   | .001     | .138     | -.058    | .897**   | .343*    | .806**   | .462**    | 1        | .212  | .458**  | .001    | .138    | -.058   | .897**  | .343*   | .806**  | .340*    | -.058    | .135     | -.093    | .873**   | .192     | .543**   | .447**     | .048       | .124       | -.077      | .806**     | .382*      | .638**     |
| Ca        | -.032    | .126     | -.025    | .109     | .255     | -.107    | .127     | -.003     | .212     | 1     | -.032   | .126    | -.025   | .109    | .255    | -.107   | .127    | -.403*   | -.390*   | -.323    | -.312    | .044     | -.437**  | -.376*   | -.144      | .064       | .050       | .037       | .040       | -.060      | .065       |
| Cd        | 1.000**  | -.002    | .348*    | -.049    | .020     | .201     | .198     | .457**    | .458**   | -.032 | 1       | -.002   | .348*   | -.049   | .020    | .201    | .198    | .856**   | .021     | .404*    | -.033    | .058     | .249     | .303     | .936**     | .060       | .361*      | -.028      | .299       | .218       | .281       |
| Cr        | -.001    | 1.000**  | .248     | .907**   | -.031    | .310     | .263     | .682**    | .001     | .126  | -.002   | 1       | .248    | .907**  | -.031   | .310    | .263    | -.075    | .819**   | .132     | .753**   | -.036    | .170     | .186     | .116       | .932**     | .353*      | .878**     | .189       | .396*      | .455**     |
| Cu        | .349*    | .248     | 1.000**  | .146     | -.060    | .327     | .392*    | .653**    | .138     | -.025 | .348*   | .248    | 1       | .145    | -.060   | .327    | .392*   | .344*    | .212     | .930**   | .128     | -.040    | .272     | .445**   | .469**     | .345*      | .914*      | .318       | .092       | .400*      | .511**     |
| Ni        | -.049    | .907**   | .145     | 1.000**  | -.069    | .192     | .154     | .540**    | -.058    | .109  | -.049   | .907**  | .145    | 1       | -.069   | .192    | .154    | -.086    | .748**   | .079     | .856**   | -.069    | .112     | .119     | .034       | .775**     | .214       | .887**     | .072       | .254       | .300       |
| Pb        | .020     | -.032    | -.060    | -.069    | 1.000**  | .258     | .781**   | .254      | .897**   | .255  | .020    | -.031   | -.060   | -.069   | 1       | .258    | .781**  | -.043    | -.105    | -.086    | -.113    | .953**   | .070     | .433*    | .031       | -.012      | -.080      | -.108      | .752**     | .289       | .544**     |

|         |        |        |        |        |        |         |         |        |        |         |        |        |        |        |        |        |        |        |        |        |        |        |        |        |         |         |         |         |         |         |         |
|---------|--------|--------|--------|--------|--------|---------|---------|--------|--------|---------|--------|--------|--------|--------|--------|--------|--------|--------|--------|--------|--------|--------|--------|--------|---------|---------|---------|---------|---------|---------|---------|
| Zn      | .200   | .310   | .327   | .192   | .258   | 1.000** | .747**  | .660** | .343*  | -.107   | .201   | .310   | .327   | .192   | .258   | 1      | .747** | .267   | .380*  | .365*  | .255   | .312   | .905** | .835** | .261    | .422*   | .350*   | .314    | .391*   | .947**  | .822**  |
| PL      | Cd CF  | Cr CF  | Cu CF  | Ni CF  | Pb CF  | Zn CF   | PL CF   | PL PLI | PL RI  | Ca      | Cd     | Cr     | Cu     | Ni     | Pb     | Zn     | PL     | Cd EF  | Cr EF  | Cu EF  | Ni EF  | Pb EF  | Zn EF  | PL EF  | Cd Igeo | Cr Igeo | Cu Igeo | Ni Igeo | Pb Igeo | Zn Igeo | PL Igeo |
| PL      | .198   | .263   | .392*  | .154   | .781** | .747**  | 1.000** | .701** | .806** | 0.127   | 0.198  | 0.263  | .392*  | .154   | .781** | .747** | 1      | .180   | .223   | .366*  | .137   | .780** | .551** | .813** | .274    | .347*   | .373*   | .225    | .730**  | .769**  | .918**  |
| Cd EF   | .856** | -.075  | .344*  | -.086  | -.043  | .267    | .180    | .410*  | .340*  | -.403*  | .856** | -.075  | .344*  | -.086  | -.043  | .267   | .180   | 1      | 0.160  | .549** | .094   | .071   | .456** | .491** | .827**  | -.009   | .318    | -.042   | .216    | .236    | .234    |
| Cr EF   | .022   | .819** | .213   | .748** | -.105  | .380*   | .223    | .636** | -.058  | -.390*  | .021   | .819** | .212   | .748** | -.105  | .380*  | .223   | .160   | 1      | .277   | .900** | .008   | .442** | .431** | .161    | .822**  | .291    | .814**  | .157    | .397*   | .394*   |
| Cu EF   | .404*  | .132   | .930** | .079   | -.086  | .364*   | .366*   | .609** | .135   | -.323   | .404*  | .132   | .930** | .079   | -.086  | .365*  | .366*  | .549** | .277   | 1      | .205   | -.001  | .433*  | .588** | .518**  | .235    | .822**  | .242    | .091    | .404*   | .464**  |
| Ni EF   | -.033  | .753** | .128   | .856** | -.113  | .255    | .137    | .513** | -.093  | -.312   | -.033  | .753** | .128   | .856** | -.113  | .255   | .137   | .094   | .900** | .205   | 1      | -.019  | .331   | .326   | .064    | .690**  | .176    | .847**  | .055    | .264    | .263    |
| Pb EF   | .058   | -.036  | -.040  | -.069  | .953** | .312    | .780**  | .321   | .873** | .044    | .058   | -.036  | -.040  | -.069  | .953** | .312   | .780** | .071   | .008   | -.001  | -.019  | 1      | .203   | .570** | .092    | -.004   | -.075   | -.083   | .831**  | .335    | .574**  |
| Zn EF   | .248   | .171   | .272   | .112   | .070   | .905**  | .551**  | .545** | .192   | -.437** | .249   | .170   | .272   | .112   | .070   | .905** | .551** | .456** | .442** | .433*  | .331   | .203   | 1      | .871** | .300    | .282    | .279    | .249    | .272    | .798**  | .632**  |
| PL EF   | .303   | .186   | .445** | .119   | .433*  | .835**  | .813**  | .707** | .543** | -.376*  | .303   | .186   | .445** | .119   | .433*  | .835** | .813** | .491** | .431*  | .588** | .326   | .570** | .871** | 1      | .393*   | .300    | .406*   | .250    | .574**  | .791**  | .813**  |
| Cd Igeo | .936** | .116   | .469** | .034   | .031   | .261    | .274    | .593** | .447** | -.144   | .936** | .116   | .469** | .034   | .031   | .261   | .274   | .827** | .161   | .518** | .064   | .092   | .300   | .393*  | 1       | .200    | .486**  | .097    | .377*   | .307    | .397*   |
| Cr Igeo | .061   | .932** | .345*  | .776** | -.012  | .422*   | .347*   | .744** | .048   | .064    | .060   | .932** | .345*  | .775** | -.012  | .422*  | .347*  | -.009  | .822** | .235   | .690** | -.004  | .282   | .300   | .200    | 1       | .475**  | .890**  | .222    | .514**  | .566**  |
| Cu Igeo | .361*  | .353*  | .914** | .214   | -.080  | .350*   | .373*   | .683** | .124   | .050    | .361*  | .353*  | .914** | .214   | -.080  | .350*  | .373*  | .318   | .291   | .822** | .176   | -.075  | .279   | .406*  | .486**  | .475**  | 1       | .434*   | .061    | .450**  | .561**  |
| Ni Igeo | -.027  | .878** | .318   | .887** | -.108  | .314    | .225    | .652** | -.077  | .037    | -.028  | .878** | .318   | .887** | -.108  | .314   | .225   | -.042  | .814** | .242   | .847** | -.083  | .249   | .250   | .097    | .890**  | .434*   | 1       | .053    | .372*   | .416*   |
| Pb Igeo | .299   | .189   | .092   | .072   | .752** | .391*   | .730**  | .567** | .806** | .040    | .299   | .189   | .092   | .072   | .752** | .391*  | .730** | .216   | .157   | .091   | .055   | .831** | .272   | .574** | .377*   | .222    | .061    | .053    | 1       | .453*   | .681**  |
| Zn Igeo | .217   | .396*  | .400*  | .254   | .289   | .947**  | .769**  | .732** | .382*  | -.060   | .218   | .396*  | .400*  | .254   | .289   | .947** | .769** | .236   | .397*  | .404*  | .264   | .335   | .798** | .791** | .307    | .514**  | .450**  | .372*   | .453**  | 1       | .903**  |
| PL Igeo | .281   | .455** | .511** | .300   | .544** | .822**  | .918**  | .848** | .638** | .065    | .281   | .455** | .511** | .300   | .544** | .822** | .918** | .234   | .394*  | .464** | .263   | .574** | .632** | .813** | .397*   | .566**  | .561**  | .416*   | .681**  | .903**  | 1       |

\*. The correlation is significant at the .05 level (bilateral). \*\*. The correlation is significant at the .01 level (bilateral).
